# Supplementary material for: Environmental signals rather than layered ontogeny imprint the function of type 2 conventional dendritic cells in young and adult mice
Source: Springer Nature journal article supplement (doi:10.1038/s41467-020-20659-2), 2021-01-19
Supplement: MOESM3 [file 41467_2020_20659_MOESM3_ESM.pdf › 41467_2020_20659_MOESM3_ESM.pdf]

## Reporting Summary

Nature Research wishes to improve the reproducibility of the work that we publish. This form provides structure for consistency and transparency in reporting. For further information on Nature Research policies, see our [Editorial Policies](#) and the [Editorial Policy Checklist](#).

### Statistics

For all statistical analyses, confirm that the following items are present in the figure legend, table legend, main text, or Methods section.

- |                                     |                                                                                                                                                                                                                                                                                                |
|-------------------------------------|------------------------------------------------------------------------------------------------------------------------------------------------------------------------------------------------------------------------------------------------------------------------------------------------|
| n/a                                 | Confirmed                                                                                                                                                                                                                                                                                      |
| <input type="checkbox"/>            | <input checked="" type="checkbox"/> The exact sample size ( $n$ ) for each experimental group/condition, given as a discrete number and unit of measurement                                                                                                                                    |
| <input type="checkbox"/>            | <input checked="" type="checkbox"/> A statement on whether measurements were taken from distinct samples or whether the same sample was measured repeatedly                                                                                                                                    |
| <input type="checkbox"/>            | <input checked="" type="checkbox"/> The statistical test(s) used AND whether they are one- or two-sided<br><i>Only common tests should be described solely by name; describe more complex techniques in the Methods section.</i>                                                               |
| <input checked="" type="checkbox"/> | <input type="checkbox"/> A description of all covariates tested                                                                                                                                                                                                                                |
| <input type="checkbox"/>            | <input checked="" type="checkbox"/> A description of any assumptions or corrections, such as tests of normality and adjustment for multiple comparisons                                                                                                                                        |
| <input type="checkbox"/>            | <input checked="" type="checkbox"/> A full description of the statistical parameters including central tendency (e.g. means) or other basic estimates (e.g. regression coefficient) AND variation (e.g. standard deviation) or associated estimates of uncertainty (e.g. confidence intervals) |
| <input type="checkbox"/>            | <input checked="" type="checkbox"/> For null hypothesis testing, the test statistic (e.g. $F$ , $t$ , $r$ ) with confidence intervals, effect sizes, degrees of freedom and $P$ value noted<br><i>Give <math>P</math> values as exact values whenever suitable.</i>                            |
| <input checked="" type="checkbox"/> | <input type="checkbox"/> For Bayesian analysis, information on the choice of priors and Markov chain Monte Carlo settings                                                                                                                                                                      |
| <input checked="" type="checkbox"/> | <input type="checkbox"/> For hierarchical and complex designs, identification of the appropriate level for tests and full reporting of outcomes                                                                                                                                                |
| <input checked="" type="checkbox"/> | <input type="checkbox"/> Estimates of effect sizes (e.g. Cohen's $d$ , Pearson's $r$ ), indicating how they were calculated                                                                                                                                                                    |

Our web collection on [statistics for biologists](#) contains articles on many of the points above.

### Software and code

Policy information about [availability of computer code](#)

|                 |                                                                                                                                                                                                                                                                                                                                                                                                                                                                                                                                                                                                                                                                                                                                                                                                                                                                                                                                                                                                                                                                                                                                                                                                                                                                                                                                                                                                                                                                                                                                                                                                                                                                                                                                                                                                                                                                 |
|-----------------|-----------------------------------------------------------------------------------------------------------------------------------------------------------------------------------------------------------------------------------------------------------------------------------------------------------------------------------------------------------------------------------------------------------------------------------------------------------------------------------------------------------------------------------------------------------------------------------------------------------------------------------------------------------------------------------------------------------------------------------------------------------------------------------------------------------------------------------------------------------------------------------------------------------------------------------------------------------------------------------------------------------------------------------------------------------------------------------------------------------------------------------------------------------------------------------------------------------------------------------------------------------------------------------------------------------------------------------------------------------------------------------------------------------------------------------------------------------------------------------------------------------------------------------------------------------------------------------------------------------------------------------------------------------------------------------------------------------------------------------------------------------------------------------------------------------------------------------------------------------------|
| Data collection | <p>-Flow cytometry data was collected using BD FACSDiva Software (BD BioSciences, Version 8)</p> <p>-Imaging data was collected using LAS X (Leica, Version 3.4.1.17670)</p>                                                                                                                                                                                                                                                                                                                                                                                                                                                                                                                                                                                                                                                                                                                                                                                                                                                                                                                                                                                                                                                                                                                                                                                                                                                                                                                                                                                                                                                                                                                                                                                                                                                                                    |
| Data analysis   | <p>-FlowJo software (Tree Star, Inc.), version 10.6 was used for analysis of flow cytometry data.</p> <p>-Microsoft Excel version 16.34 was used for table creation.</p> <p>-GraphPad Prism 7 was used for graphical and statistical analysis.</p> <p>-Fiji version 2.0.0 was used for analysis of imaging data.</p> <p>-For bulk RNA sequencing, STAR (version 2.5.2a) was used to map RNA sequencing reads to the mouse genome (mm10). RSEM (version 1.2.31) was used to calculate expression of genes in transcript per million. RNA-seq analysis was performed in R (Version 3.5.3) with R-Studio (R-Studio Inc, Version 1.1.383). Differential gene expression analysis and principal component analysis was performed using DESeq2 (Version 1.22.2). Log2 fold change shrinkage was performed using the Apeglm package (Version 1.6.0). Heatmaps were generated using pheatmap (Version 1.0.12) and graphs were plotted with ggplot2 (Version 3.0.2).</p> <p>-For single cell RNA sequencing, data was processed using the 10X Genomics Cell Ranger v3.0.2 pipeline. Sequencing reads were mapped to the mouse genome (mm10) using STAR (version 2.5.1b) after spiking in the sequences of iCRE (GenBank iD: AY056050.1), the predicted transcript of the unrecombined Rosa locus and Tomato sequence (GenBank ID: AY678269.1). Cell Ranger's count pipeline was run under default parameters. Further downstream analysis was conducted in R (Version 3.5.3) with R-Studio (R-Studio Inc, Version 1.1.383) using Seurat (v3.0.2) and SCTransform (version 0.3). For trajectory analysis the Palantir package was used.</p> <p>-tSNE and UMAP algorithms (as part of DESeq2 and Seurat packages) were used for single cell and bulk RNA analyses.</p> <p>-LEGENDplex™ cloud based program was used for analysis of cytokines in culture supernatants.</p> |

For manuscripts utilizing custom algorithms or software that are central to the research but not yet described in published literature, software must be made available to editors and reviewers. We strongly encourage code deposition in a community repository (e.g. GitHub). See the Nature Research [guidelines for submitting code & software](#) for further information.

## Data

Policy information about [availability of data](#)

All manuscripts must include a [data availability statement](#). This statement should provide the following information, where applicable:

- Accession codes, unique identifiers, or web links for publicly available datasets
- A list of figures that have associated raw data
- A description of any restrictions on data availability

The authors declare that the data supporting the findings of this study are available within the paper and its supplementary files. Source data are provided with this paper and raw data are available from the authors upon reasonable request. Datasets related to bulk and single cell sequencing experiments that were generated and analyzed for the current study have been deposited and made publicly available in the Gene Expression Omnibus under the accession number GSE151595 (<https://www.ncbi.nlm.nih.gov/geo/query/acc.cgi?acc=GSE151595>). The sequences of iCRE and Tomato used for the single cell RNA sequencing analysis are publicly available and can be found under the GenBank IDs AY056050.1 (<https://www.ncbi.nlm.nih.gov/nucleotide/AY056050>) and AY678269.1 (<https://www.ncbi.nlm.nih.gov/nucleotide/AY678269>), respectively.

## Field-specific reporting

Please select the one below that is the best fit for your research. If you are not sure, read the appropriate sections before making your selection.

☒ Life sciences ☐ Behavioural & social sciences ☐ Ecological, evolutionary & environmental sciences

For a reference copy of the document with all sections, see [nature.com/documents/nr-reporting-summary-flat.pdf](https://www.nature.com/documents/nr-reporting-summary-flat.pdf)

## Life sciences study design

All studies must disclose on these points even when the disclosure is negative.

|                 |                                                                                                                                                                                                                                                                                                                                                                                                                                                                                                                                                                                                                                                                                                                                                                                                                                                                     |
|-----------------|---------------------------------------------------------------------------------------------------------------------------------------------------------------------------------------------------------------------------------------------------------------------------------------------------------------------------------------------------------------------------------------------------------------------------------------------------------------------------------------------------------------------------------------------------------------------------------------------------------------------------------------------------------------------------------------------------------------------------------------------------------------------------------------------------------------------------------------------------------------------|
| Sample size     | No statistical methods were used to predetermine the sample size. All experiments were repeated at least 2 times to ensure an overall sample size of at least 3 per experimental group. The exact n values used to calculate the statistics are provided per experiment presented in the main and supplementary figures of the manuscript. For all experiments with neonatal and young mice, multiple mice were pooled in order to get sufficient number of cells.                                                                                                                                                                                                                                                                                                                                                                                                  |
| Data exclusions | For single cell RNA sequencing analysis, cells with less than 200 genes detected or having more than 7.5% of mitochondrial associated genes were excluded from the analysis. Additionally, genes detected in less than 3 cells were removed from further analysis. These exclusion criteria are pre-established by the default parameters of the Seurat package and enable the removal of cells with poor sequencing quality (low number of total detected genes), dying cells (increased representation of mitochondrial associated genes) and of genes not reliably detected. For other experiments, when necessary data points were excluded if technical issues arose that prevented their reliable analysis (e.g. spread >30% between technical replicates in cytokine quantification of culture supernatants according to the manufacturer's recommendation). |
| Replication     | Number of replicates is indicated in each experiments. In general, data presented are the result of at least 2 independent experiments with multiple biological replicates. All attempts for replication were successful.                                                                                                                                                                                                                                                                                                                                                                                                                                                                                                                                                                                                                                           |
| Randomization   | Mice were housed in the same room and rack in the respective animal facilities. Littermates were used for experiments whenever possible per developmental timepoint. For bulk and single cell RNA sequencing experiments mice were sex-matched.                                                                                                                                                                                                                                                                                                                                                                                                                                                                                                                                                                                                                     |
| Blinding        | The investigators were not blinded during collection of animal tissues in experiments implementing mice of different age groups due to obvious differences in organ size. When mice of the same age but different genotypes were used, the investigators were blinded to their genotype during data collection and analysis. Genotyping was conducted by an independent person. In all experiments, samples were processed simultaneously or in parallel.                                                                                                                                                                                                                                                                                                                                                                                                           |

## Reporting for specific materials, systems and methods

We require information from authors about some types of materials, experimental systems and methods used in many studies. Here, indicate whether each material, system or method listed is relevant to your study. If you are not sure if a list item applies to your research, read the appropriate section before selecting a response.

## Materials &amp; experimental systems

## Methods

|                                     |                                                                 |
|-------------------------------------|-----------------------------------------------------------------|
| n/a                                 | Involved in the study                                           |
| <input type="checkbox"/>            | <input checked="" type="checkbox"/> Antibodies                  |
| <input checked="" type="checkbox"/> | <input type="checkbox"/> Eukaryotic cell lines                  |
| <input checked="" type="checkbox"/> | <input type="checkbox"/> Palaeontology and archaeology          |
| <input type="checkbox"/>            | <input checked="" type="checkbox"/> Animals and other organisms |
| <input checked="" type="checkbox"/> | <input type="checkbox"/> Human research participants            |
| <input checked="" type="checkbox"/> | <input type="checkbox"/> Clinical data                          |
| <input checked="" type="checkbox"/> | <input type="checkbox"/> Dual use research of concern           |

|                                     |                                                    |
|-------------------------------------|----------------------------------------------------|
| n/a                                 | Involved in the study                              |
| <input checked="" type="checkbox"/> | <input type="checkbox"/> ChIP-seq                  |
| <input type="checkbox"/>            | <input checked="" type="checkbox"/> Flow cytometry |
| <input checked="" type="checkbox"/> | <input type="checkbox"/> MRI-based neuroimaging    |

## Antibodies

## Antibodies used

All antibody details are listed in Supplementary Table 4 and also listed below:

Antibody used for flow cytometry-Clone-Source-Catalog number:

anti-CD3 $\epsilon$ -Pacific Blue (PB) 145-2C11 Biolegend 100334  
 anti-CD3 $\epsilon$ -Fluorescein isothiocyanate (FITC) 145-2C11 Biolegend 100306  
 anti-CD3 $\epsilon$ -R-phycoerythrin-cyanine 5 (PE-Cy5) 145-2C11 Biolegend 100310  
 anti-CD4-PB RM4-5 Biolegend 100531  
 anti-CD4-PE-Cy5 RM4-5 Biolegend 100513  
 anti-CD4-PE-Cy7 RM4-5 Biolegend 100528  
 anti-CD4-FITC RM4-4 Biolegend 100406  
 anti-CD4-BUV737 GK1.5 BD 612844  
 anti-CD8a-PE-Cy5 53-6.7 Biolegend 100709  
 anti-CD8a-PB 53-6.7 Biolegend 100725  
 anti-CD8a-FITC 53-6.7 BD 553031  
 anti-CD11b-BV421 M1/70 Biolegend 101236  
 anti-CD11b-BV605 M1/70 Biolegend 101237  
 anti-CD11b-Allophycocyanin-cyanine 7 (APC-Cy7) M1/70 Biolegend 101226  
 anti-CD11b-BUV737 M1/70 BD 612800  
 anti-CD11c-BV785 N418 Biolegend 117336  
 anti-CD11c-Peridinin-chlorophyll (PerCP)-Cy5.5 N418 Biolegend 117328  
 anti-CD16/32 purified 2.4G2 BD 553142  
 anti-CD19-PB 6D5 Biolegend 115523  
 anti-CD19-BV650 6D5 Biolegend 115541  
 anti-CD19-FITC 6D5 Biolegend 115506  
 anti-CD24-FITC M1/69 Biolegend 101806  
 anti-CD24-BV605 M1/69 Biolegend 101827  
 anti-CD24-PE M1/69 Biolegend 101808  
 anti-CD24-BUV395 M1/69 BD 744471  
 anti-CD25-BV785 PC61 Biolegend 102051  
 anti-CD26-PE-Cy7 H194-112 Biolegend 137810  
 anti-CD26-APC H194-112 Biolegend 137807  
 anti-CD38-FITC 90 Biolegend 102705  
 anti-CD43-PE-Cy7 1B11 Biolegend 121218  
 anti-CD45.1-PB A20 Biolegend 110722  
 anti-CD45.1-FITC A20 Biolegend 110706  
 anti-CD45.2-PE-Cy7 104 Biolegend 109830  
 anti-CD45.2-PB 104 Biolegend 109820  
 anti-CD45R/B220-PB RA3-6B2 Biolegend 103227  
 anti-CD45R/B220-FITC RA3-6B2 Biolegend 103206  
 anti-CD45R/B220-PE RA3-6B2 Biolegend 103208  
 anti-CD45R/B220-PE-Cy5 RA3-6B2 Biolegend 103210  
 anti-CD45R/B220- Alexa Fluor (AF) 700 RA3-6B2 Biolegend 103232  
 anti-CD64-FITC X54-5/7.1 Biolegend 139316  
 anti-CD64-PE-Cy7 X54-5/7.1 Biolegend 139314  
 anti-CD64-APC X54-5/7.1 Biolegend 139306  
 anti-CD80-FITC 16-10A1 Biolegend 104706  
 anti-CD80-PE 16-10A1 Biolegend 104707  
 anti-CD86-BV605 GL-1 Biolegend 105037  
 anti-CD90.1-FITC OX-7 Biolegend 202504  
 anti-CD90.1-AF700 OX-7 Biolegend 202528  
 anti-CD90.1-PE-Cy7 OX-7 Biolegend 202517  
 anti-CD90.2-PE-Cy7 30-H12 Biolegend 105326  
 anti-CD90.2-AF700 30-H12 Biolegend 105320

anti-CD115-BV605 AFS98 Biolegend 135517  
 anti-CD117-PE-Cy7 2B8 Biolegend 105814  
 anti-CD127-BUV737 SB/199 BD 564399  
 anti-CD135-APC A2F10 Biolegend 135310  
 anti-CD135-PE A2F10 Biolegend 135306  
 anti-CD161c/NK1.1-PB PK136 Biolegend 108722  
 anti-CD161c/NK1.1-PE-Cy5 PK136 Biolegend 108716  
 anti-CD161c/NK1.1-FITC PK136 Biolegend 108706  
 anti-CD172a-PE-Cy7 P84 Biolegend 144008  
 anti-CD172a-BV605 P84 Biolegend 740390  
 anti-CD172a-PerCP-ef710 P84 Thermo Fisher Scientific 46-1721-82  
 anti-CD196/CCR6-BV421 29-2L17 Biolegend 129817  
 anti-CD274/PD-L1-BV421 10F.9G2 Biolegend 124315  
 anti-CD274/PD-L1-BV605 10F.9G2 Biolegend 124321  
 anti-CD370/DNGR-1-PE 1F6 Biolegend 92068  
 anti-F4/80-BV605 BM8 Biolegend 123133  
 anti-F4/80-BV785 BM8 Biolegend 123141  
 anti-F4/80-AF647 BM8 Biolegend 123122  
 anti-MHCII A/I-E-AF700 M5/114.15.2 Biolegend 107622  
 anti-MHCII I-A/I-E-BV510 M5/114.15.2 Biolegend 107635  
 anti-MHCII I-A/I-E-PB M5/114.15.2 Biolegend 107620  
 anti-MHCII I-A/I-E-PerCP-ef710 M5/114.15.2 Thermo Fisher Scientific 46-5321-80  
 anti-Ly-6A/E-BV650 D7 Biolegend 108143  
 anti-Ly6C-PB HK1.4 Biolegend 128014  
 anti-Ly6C-FITC HK1.4 Biolegend 128005  
 anti-Ly6G-FITC 1A8 Biolegend 127606  
 anti-Ly6G-AF700 1A8 Biolegend 127616  
 anti-Ly6G-APC 1A8 Biolegend 127614  
 anti-SiglecH eFluor660 eBio440c Thermo Fisher Scientific 50-0333-82  
 anti-CLEC4A4/33D1-APC 33D1 Biolegend 124914  
 anti-XCR1-BV421 ZET Biolegend 148216  
 anti-XCR1-BV650 ZET Biolegend 148220  
 anti-V-alpha2 TCR-FITC B20.1 BD 553288  
 anti-V-alpha2 TCR-BUV395 B20.1 BD 743834  
 anti-TER-119-PB TER-119 Biolegend 116232  
 anti-TER-119-FITC TER-119 Biolegend 116206  
 anti-TER-119-PE-Cy5 TER-119 Biolegend 116209  
 anti-TER-119-BUV395 TER-119 BD 566206  
 anti-ESAM 1G8/ESAM Biolegend 136207  
 anti-Foxp3-AF647 150D Biolegend 320014  
 anti-RORyt-BV421 Q31-378 BD 562894  
 anti-IFN-γ-APC XMG1.2 Biolegend 505810  
 IFN-γ-PE/Dazzle 594 XMG1.2 Biolegend 505846  
 IFN-γ-BV650 XMG1.2 Biolegend 505831  
 anti-IL17A TC11-18H10.1 Biolegend 506907  
 anti-IL-4-PE 11B11 Biolegend 504104  
 anti-TNFα-PECy7 MP6-XT22 Biolegend 506324  
 anti-TNFα-PE MP6-XT22 Biolegend 506305

Antibody used for microscopy-Clone-Source-Catalog number:

anti-CD3ε-BV421 145-2C11 Biolegend 100336  
 anti-CD11b-AF647 M1/70 Biolegend 101220  
 anti-CD31-AF594 MEC13.3 Biolegend 102520  
 anti-MHCII A/I-E-AF488 M5/114.15.2 Biolegend 107616

Antibody used for in vivo targeting-Clone-Source-Catalog number:

αDCIR2-OVA 33D1 Dr. Diana Dudziak N/A

#### Validation

Commercially available antibodies have been validated by their respective vendors for species reactivity and application in flow cytometry and/or microscopy. Validation data are available on the manufacturer's website using the catalog number of each product. All commercial antibodies were further tested by flow cytometry in our lab on murine splenocytes or bone marrow cells to define their dilution factor, by performing serial dilution experiments.

Antibodies used for in vivo targeting experiments have been validated in previous studies PMIDs: 17204652 and 28389502

## Animals and other organisms

Policy information about [studies involving animals](#); [ARRIVE guidelines](#) recommended for reporting animal research

### Laboratory animals

Throughout this study, mice of various ages were used as indicated in the respective experiments. Mice over the age of 8 weeks were considered adults. The neonatal period was defined as the first 10 days of life. Mice younger than 3 weeks of age were euthanized by decapitation. Adult mice were euthanized by cervical dislocation. Mice were sex-matched but male and female mice were used for all experiments. In most experiments, littermates were used. When littermates could not be used, e.g. in experiments involving mice of different age, all mice were kept under the same barrier conditions and in the same racks. Only germ-free mice and the respective SPF controls used were not co-housed/bred under the same barrier.

Mice were maintained in specific pathogen-free SPF conditions with a 12 hour dark/light cycle, in individually vented cages (IVCs, type II long cages, measuring 18x30x13 cm with stocking density according to EU guideline 2010/63) supplied with autoclaved bedding, play tunnels, nestles and mouse houses. Irradiated food and sterile filtered and UV-light exposed water were provided ad libitum. Cage manipulations took place in laminar flow hoods. Air temperature was  $22 \pm 2^\circ\text{C}$  and humidity  $55 \pm 10\%$  with daily control and record.

The following mouse strains were bred at the Biomedical Center or Walter-Brendel- Centre for Experimental Medicine in specific pathogen-free conditions:

- Clec9atm2.1(cre)Crs (Clec9a-cre) (Jackson Laboratory Stock No: 025523)
- Gt(ROSA)26Sortm1(EYFP)Cos (Rosa26lox-STOP-lox-EYFP) (Jackson Laboratory Stock No: 006148)
- Gt(ROSA)26Sortm9(CAG-tdTomato)Hze (Rosa26lox-STOP-lox-tdtomato) (Jackson Laboratory Stock No: 007909)
- Tg(Csf1r-cre/Esr1\*)1Jwp (Csf1rMer-iCre-Mer) (Jackson Laboratory Stock No: 019098)
- Flt3ltm1Imx (Flt3l-/-) (MMRRC Stock No: 37395-JAX)
- Mybtm1Ssp (Myb+/-) (Jackson Laboratory Stock No: 004757)
- Rag1tm1(cre)Thr (Rag1cre)
- Tg(TcraTcrb)425Cbn (OT-II) (Jackson Laboratory Stock No: 004194) crossed to a Thy1.1 (CD90.1) background
- Tg(Rorc-EGFP)1Ebe (RorceGFP)
- Cxcr4creER
- Gt(ROSA)26Sortm4(ACTB-tdTomato,-EGFP)Luo/J (RosamTmG) (Jackson Laboratory Stock No: 007576)
- Ly5.1 (CD45.1) B6.SJL (Jackson Laboratory Stock No: 002014)
- C57BL/6J

The following mouse strains were bred at the Institute of Immunology and Immunotherapy, College of Medical and Dental Sciences, University of Birmingham, Birmingham:

- Tg(Rorc-cre)1Litt (Rorc-cre) (Jackson Laboratory Stock No: 022791)
- I7rtm1.1(cre)Hrr (IL7Rcre)
- Gt(ROSA)26Sortm1Hjf (Rosa26lox-STOP-lox-RFP) (EMMA strain ID EM:02112)

The following mouse strains were bred at the University Hospital Erlangen, Germany:

- Ifnar1tm1Agt (Ifnar-/-) (MMRRC Stock No: 32045-JAX)

Germ Free mice were provided by Dirk Haller.

### Wild animals

No wild animals were used in this study.

### Field-collected samples

No field-collected samples were used in this study.

### Ethics oversight

All animal procedures were performed in accordance with national and institutional guidelines for animal welfare and approved by the Regierung of Oberbayern.

Note that full information on the approval of the study protocol must also be provided in the manuscript.

## Flow Cytometry

### Plots

Confirm that:

- ☐ The axis labels state the marker and fluorochrome used (e.g. CD4-FITC).
- ☒ The axis scales are clearly visible. Include numbers along axes only for bottom left plot of group (a 'group' is an analysis of identical markers).
- ☐ All plots are contour plots with outliers or pseudocolor plots.
- ☒ A numerical value for number of cells or percentage (with statistics) is provided.

### Methodology

#### Sample preparation

Cell isolation for flow cytometry:

Spleens were minced into small pieces and digested in 1mL of RPMI with 200U/mL collagenase IV and 0.2mg/mL DNase I for 30 min at  $37^\circ\text{C}$  while shaking. After digestion, cells were passed through a  $70\mu\text{m}$  strainer and washed once with FACS buffer

(PBS, 1% fetal calf serum (FCS), 2.5mM EDTA, 0.02% sodium azide). Erythrocytes were lysed with Red Blood Cell Lysing Buffer Hybri-Max for 2min at room temperature, washed once and resuspended in FACS buffer for further analysis. Bone marrow from adult mice was isolated from femurs and tibiae by flushing, bone marrow from mice under two weeks of age was isolated by crushing the bones through a 70µm cell strainer. Erythrocytes were lysed as above, and cells were resuspended in FACS buffer for further analysis. Liver was minced into small pieces and digested in 2mL PBS containing Mg2+ and Ca2+ with 1mg/mL collagenase IV, 60U/mL DNase I, 2.4mg/mL Dispase II and 3% FCS for 30min at 37°C while shaking. After digestion, cells were passed through a 100µm strainer and centrifuged for 3min at 50g at 4°C in order to pellet hepatocytes. The supernatant was collected and recentrifuged for 7min at 320g at 4°C. Pelleted cells were resuspended in FACS buffer for further analysis.

Cell isolation for cell sorting and functional analyses:

Cell isolation from spleen was performed as above but FACS buffer without sodium azide was used for all functional and RNA profiling experiments. For OT-II cell isolation spleen was mechanically disrupted through a 70µm strainer and washed once with FACS buffer without sodium azide. For targeting experiments, splenocytes were isolated by mechanically disrupting the spleens through a 70µm strainer and washing once with PBS containing 1% FCS.

|                           |                                                                                                                                                                                                                                                                                                                                                                                                                                                                                                                                                                                                                                                                                                                                                                                                                                                                                                                                                                                                                                                                                                                                                                                                                                                                                                                                                                                                                                                      |
|---------------------------|------------------------------------------------------------------------------------------------------------------------------------------------------------------------------------------------------------------------------------------------------------------------------------------------------------------------------------------------------------------------------------------------------------------------------------------------------------------------------------------------------------------------------------------------------------------------------------------------------------------------------------------------------------------------------------------------------------------------------------------------------------------------------------------------------------------------------------------------------------------------------------------------------------------------------------------------------------------------------------------------------------------------------------------------------------------------------------------------------------------------------------------------------------------------------------------------------------------------------------------------------------------------------------------------------------------------------------------------------------------------------------------------------------------------------------------------------|
| Instrument                | LSR Fortessa (BD Biosciences), Aria III Fusion (BD Biosciences)                                                                                                                                                                                                                                                                                                                                                                                                                                                                                                                                                                                                                                                                                                                                                                                                                                                                                                                                                                                                                                                                                                                                                                                                                                                                                                                                                                                      |
| Software                  | Data Collection: BD FACSDiva Software (BD BioSciences), version 8.<br>Data Analysis: FlowJo software (Tree Star, Inc.), version 10.6.                                                                                                                                                                                                                                                                                                                                                                                                                                                                                                                                                                                                                                                                                                                                                                                                                                                                                                                                                                                                                                                                                                                                                                                                                                                                                                                |
| Cell population abundance | Sample purity was confirmed post sort by flow cytometry and cells counts were quantified using CountBright™ Absolute Counting Beads (Thermo Fisher Scientific).                                                                                                                                                                                                                                                                                                                                                                                                                                                                                                                                                                                                                                                                                                                                                                                                                                                                                                                                                                                                                                                                                                                                                                                                                                                                                      |
| Gating strategy           | All samples were initially gated on FSC-A vs SSC-A plot, doublet exclusion was performed using FSC-A vs FSC-H and FSC-A vs SSC-W plots and live cells were gated selecting cell negative for DAPI or fixable viability dye eFluor™ 780. Autofluorescent red pulp macrophages were identified by plotting F4/80 vs an empty channel. Cell populations were identified as follows and gating strategies are shown in Fig 1, Suppl Fig 1, Suppl Fig 2, Suppl Fig 3 and Suppl Fig 5:<br>DCs: autofluorescence-CD11c+MHCII+CD64-(CD24+XCR1+/- or CD11b+ESAMhigh/low), Bone marrow derived DCs from FLT3L cultures: CD45.2+B220-SiglecH-CD11c+MHCII+(CD24+ or CD172a+), Bone marrow pre-cDCs: lin-MHCII-CD11b <sup>low</sup> CD11c+CD135+CD172aint, Splenic pre-cDCs: lin-MHCII-CD11b <sup>low</sup> CD11c+CD43+CD135+CD172aint, CDPs: lin-CD11c-MHCII-CD11b <sup>low</sup> CD115+CD135+CD117 <sup>low</sup> , MDPs: lin-CD11c-MHCII-CD11b <sup>low</sup> CD115+CD135+CD117 <sup>high</sup> , CLPs: lin-CD11b-/lowCD115-CD117 <sup>int</sup> Sca-1 <sup>int</sup> CD135+CD127+, Bone marrow TER119+ cells: lin-CD117-TER119+, Splenic macrophages: F4/80 <sup>high</sup> CD11b <sup>low</sup> , Neutrophils: Ly6G+CD11b <sup>high</sup> or Ly6C+CD11b <sup>high</sup> , B cells: CD19+ or CD11c-B220+, Splenic ILCs: lin-CD11b-CD90.2+CD127+, pDCs: CD11c <sup>int</sup> B220+, OT-II T cells after co-culture with APCs: CD90.1+CD4+TCR $\alpha$ 2+CD11c- |

☒ Tick this box to confirm that a figure exemplifying the gating strategy is provided in the Supplementary Information.
